# Supplementary material
Source: MDPI journal article supplement (https://www.mdpi.com/2073-4433/12/9/1109)
Supplement: s1 [file s1]

## Article

# Supplementary materials: Spatial distribution and chemical composition of road dust in two high-altitude Latin American cities <sup>†</sup>

Sebastián Vanegas <sup>1</sup>, Erika M. Trejos <sup>2</sup>, Beatriz H. Aristizábal <sup>2</sup>, Guilherme M. Pereira <sup>3</sup>, Julio M. Hernández <sup>4</sup>, Jorge Herrera Murillo <sup>4</sup>, Omar Ramírez <sup>5,\*</sup>, Fulvio Amato <sup>6</sup>, Luis F. O. Silva <sup>7</sup>, Néstor Y. Rojas <sup>1</sup>, Carlos Zafra <sup>8</sup> and Jorge E. Pachón <sup>9,\*</sup>

<sup>1</sup> Department of Chemical and Environmental Engineering, Universidad Nacional de Colombia - Sede Bogotá, Bogotá, 111321, Colombia; giovanegasg@unal.edu.co (S.V.); nyrojasr@unal.edu.co (N.Y.R.)

<sup>2</sup> Hydraulic Engineering and Environmental Research Group, Universidad Nacional de Colombia - Sede Manizales, Manizales, 170004, Colombia; emtrejosz@unal.edu.co (E.M.T.); bharistizabalz@unal.edu.co (B.H.A.)

<sup>3</sup> Institute of Chemistry, Universidade de São Paulo, São Paulo, 05580-000, Brazil; guilherme.martins.pereira@usp.br

<sup>4</sup> Environmental Analysis Laboratory, Environmental Sciences School, Universidad Nacional de Costa Rica, Heredia, 40101, Costa Rica; jucemuhe@gmail.com (J.M.H.); jorge.herrera.murillo@una.cr (J.H.M.)

<sup>5</sup> Environmental Engineering Program, Universidad Militar Nueva Granada, Cajicá-Zipacquirá, 250247, Colombia; omar.ramirez@unimilitar.edu.co

<sup>6</sup> Institute for Environmental Assessment and Water Research (IDÆA), Spanish National Research Council (CSIC), Barcelona, 08034, Spain; fulvio.amato@idaea.csic.es

<sup>7</sup> Department of Civil and Environmental Engineering, Universidad de la Costa, Barranquilla, 080002, Colombia; lsilva8@cuc.edu.co

<sup>8</sup> Environmental Engineering Research Group – GIAUD, Universidad Distrital Francisco José de Caldas, Bogotá, 110321, Colombia; czafra@udistrital.edu.co

<sup>9</sup> Centro Lasallista de Investigación y Modelación Ambiental – CLIMA, Universidad de La Salle, Bogotá, 111711, Colombia; jpachon@unisalle.edu.co

\* Correspondence: Omar Ramírez, omar.ramirez@unimilitar.edu.co, +57 301 2414281 and Jorge E. Pachón, jpachon@unisalle.edu.co, +57 310 3173756.

<sup>†</sup> This paper is dedicated to the memory of Professor Beatriz H. Aristizábal.

## Supplementary materials

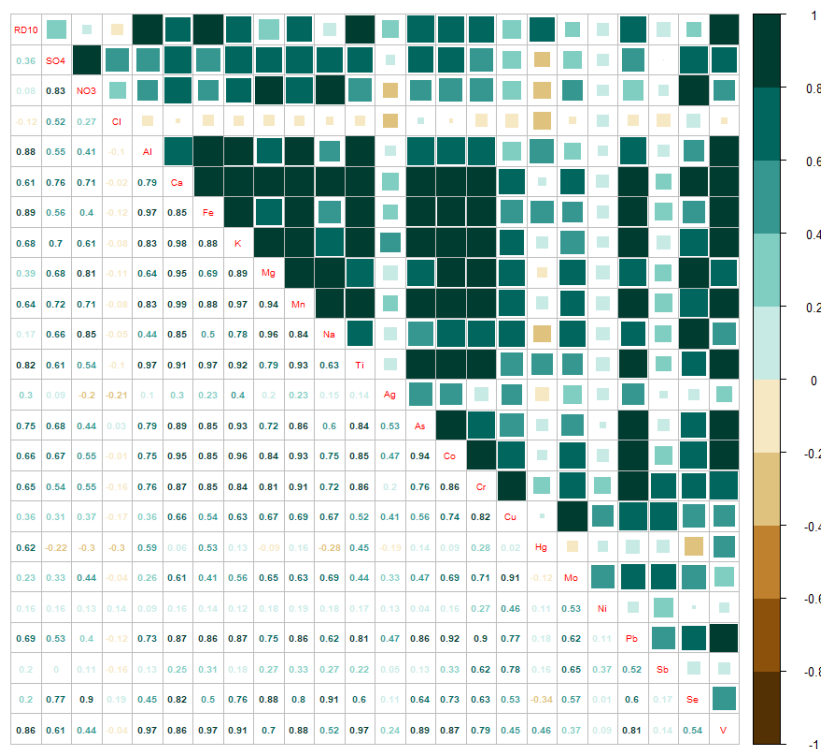

(a)

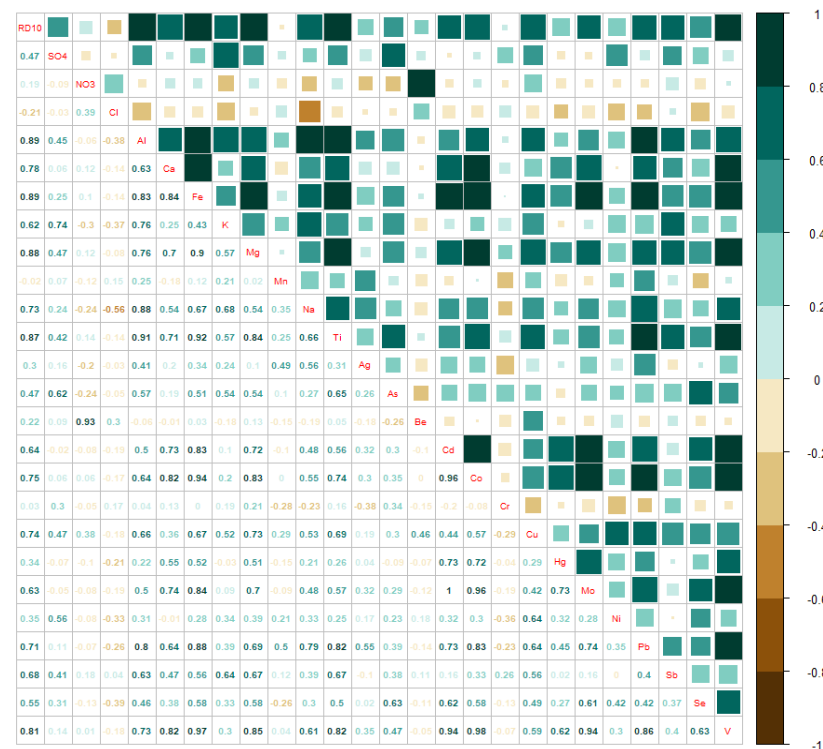

(b)

**Figure S1.** Correlation matrix of chemically analyzed elements for road dust in the cities of: (a) Bogota and (b) Manizales.

**Table S1.** Calculation methodology for determining loads in RD<sub>10</sub>.

| Determination                                                                | Equation                                                             | Variables                                                                                                                                                                                                                                                                                                                                                                                                                         |
|------------------------------------------------------------------------------|----------------------------------------------------------------------|-----------------------------------------------------------------------------------------------------------------------------------------------------------------------------------------------------------------------------------------------------------------------------------------------------------------------------------------------------------------------------------------------------------------------------------|
| RD <sub>10</sub> , sediment load or road dust with diameter less than 10 µg. | $RD_{10} = \frac{(W_2/W_1)}{(A_m)}$                                  | RD <sub>10</sub> → Sediment load or road dust with diameter less than 10 µg<br>W <sub>1</sub> → Filter weight without impact - before sampling (mg)<br>W <sub>2</sub> → Filter weight impacted - after sampling (mg)<br>A <sub>m</sub> → Sampled road area (m <sup>2</sup> )                                                                                                                                                      |
| Loading the element in the RD <sub>10</sub>                                  | $C_x = \frac{(C_i - C_{blk}) \times A_i \times V_L}{A_L \times A_m}$ | C <sub>x</sub> → Element loading (µg/m <sup>2</sup> )<br>C <sub>i</sub> → Concentration of the element in the analyzed sample (mg/L)<br>C <sub>blk</sub> → Element concentration on the field blank (mg/L)<br>A <sub>i</sub> → Filter impacted area (cm <sup>2</sup> )<br>V <sub>L</sub> → Volume leached (ml)<br>A <sub>L</sub> → Leached filter area (cm <sup>2</sup> )<br>A <sub>m</sub> → Sampled road area (m <sup>2</sup> ) |

**Table S2.** Concentrations in upper continental crust.

| Element                                                                                                                                                                                                                      | Concentrations (mg/Kg) |
|------------------------------------------------------------------------------------------------------------------------------------------------------------------------------------------------------------------------------|------------------------|
| Al                                                                                                                                                                                                                           | 80400                  |
| Ca                                                                                                                                                                                                                           | 29450                  |
| Fe                                                                                                                                                                                                                           | 30890                  |
| K                                                                                                                                                                                                                            | 28000                  |
| Mn                                                                                                                                                                                                                           | 527                    |
| Ti                                                                                                                                                                                                                           | 31117                  |
| As                                                                                                                                                                                                                           | 2                      |
| Co                                                                                                                                                                                                                           | 11.6                   |
| Cr                                                                                                                                                                                                                           | 35                     |
| Cu                                                                                                                                                                                                                           | 14.3                   |
| Mo                                                                                                                                                                                                                           | 0.083                  |
| Ni                                                                                                                                                                                                                           | 18.6                   |
| Pb                                                                                                                                                                                                                           | 17                     |
| Sb                                                                                                                                                                                                                           | 0.31                   |
| Se                                                                                                                                                                                                                           | 0.083                  |
| V                                                                                                                                                                                                                            | 53                     |
| <b>Source:</b> Reimann, C.; de Caritat, P. Chemical Elements in the Environment. Factsheets for the Geochemist and Environmental Scientist; 1st edition; Springer, Berlin, Heidelberg; Berlin, 1998; ISBN 978-3-642-72018-5. |                        |

Table S3. Results of chemical species analyzed for each city (Bogotá and Manizales).

| ID Point         | RD <sub>10</sub><br>mg/m <sup>3</sup> | SO <sub>4</sub> <sup>2-</sup><br>μg/m <sup>3</sup> | NO <sub>3</sub> <sup>-</sup><br>μg/m <sup>3</sup> | Cl <sup>-</sup><br>μg/m <sup>3</sup> | Al<br>μg/m <sup>3</sup> | Ca<br>μg/m <sup>3</sup> | Fe<br>μg/m <sup>3</sup> | K<br>μg/m <sup>3</sup> | Mg<br>μg/m <sup>3</sup> | Mn<br>μg/m <sup>3</sup> | Na<br>μg/m <sup>3</sup> | Ti<br>μg/m <sup>3</sup> | Ag<br>μg/m <sup>3</sup> | As<br>μg/m <sup>3</sup> | Be<br>μg/m <sup>3</sup> | Cd<br>μg/m <sup>3</sup> | Co<br>μg/m <sup>3</sup> | Cr<br>μg/m <sup>3</sup> | Cu<br>μg/m <sup>3</sup> | Hg<br>μg/m <sup>3</sup> | Mo<br>μg/m <sup>3</sup> | Ni<br>μg/m <sup>3</sup> | Pb<br>μg/m <sup>3</sup> | Sb<br>μg/m <sup>3</sup> | Se<br>μg/m <sup>3</sup> | V<br>μg/m <sup>3</sup> |
|------------------|---------------------------------------|----------------------------------------------------|---------------------------------------------------|--------------------------------------|-------------------------|-------------------------|-------------------------|------------------------|-------------------------|-------------------------|-------------------------|-------------------------|-------------------------|-------------------------|-------------------------|-------------------------|-------------------------|-------------------------|-------------------------|-------------------------|-------------------------|-------------------------|-------------------------|-------------------------|-------------------------|------------------------|
| 9                | 1.82                                  | 8.15                                               | 5.05                                              | 0.00                                 | 49.45                   | 49.18                   | 25.40                   | 21.96                  | 19.78                   | 0.23                    | 45.94                   | 0.96                    | 0.02                    | 0.00                    | 0.00                    | 0.00                    | 0.00                    | 0.26                    | 1.06                    | 0.10                    | 0.01                    | 0.04                    | 0.24                    | 0.00                    | 0.00                    | 0.00                   |
| 10               | 2.41                                  | 5.43                                               | 0.00                                              | 0.00                                 | 52.89                   | 36.16                   | 32.24                   | 13.06                  | 8.18                    | 0.27                    | 2.83                    | 1.13                    | 0.01                    | 0.00                    | 0.00                    | 0.00                    | 0.00                    | 0.16                    | 0.22                    | 0.07                    | 0.00                    | 0.00                    | 0.21                    | 0.01                    | 0.00                    | 0.01                   |
| 1                | 3.26                                  | 23.67                                              | 0.00                                              | 0.00                                 | 150.93                  | 65.31                   | 74.76                   | 20.19                  | 24.09                   | 0.43                    | 38.72                   | 2.30                    | 0.12                    | 0.00                    | 0.00                    | 0.00                    | 0.00                    | 0.28                    | 0.63                    | 0.07                    | 0.02                    | 1.04                    | 0.49                    | 0.08                    | 0.00                    | 0.08                   |
| 7                | 4.60                                  | 10.34                                              | 0.00                                              | 0.00                                 | 198.80                  | 233.09                  | 132.19                  | 29.30                  | 41.53                   | 1.14                    | 92.30                   | 5.43                    | 0.01                    | 0.01                    | 0.00                    | 0.00                    | 0.02                    | 0.73                    | 1.61                    | 0.13                    | 0.07                    | 0.18                    | 0.96                    | 0.19                    | 0.00                    | 0.27                   |
| 20               | 6.04                                  | 89.16                                              | 53.07                                             | 40.40                                | 160.85                  | 208.35                  | 89.72                   | 24.86                  | 14.25                   | 0.80                    | 19.05                   | 3.21                    | 0.00                    | 0.01                    | 0.00                    | 0.00                    | 0.01                    | 0.42                    | 0.45                    | 0.00                    | 0.02                    | 1.55                    | 0.53                    | 0.04                    | 0.00                    | 0.20                   |
| 17               | 6.05                                  | 12.21                                              | 8.90                                              | 0.00                                 | 37.54                   | 41.22                   | 16.67                   | 8.51                   | 14.52                   | 0.17                    | 7.19                    | 0.86                    | 0.00                    | 0.00                    | 0.00                    | 0.00                    | 0.00                    | 0.04                    | 0.00                    | 0.00                    | 0.00                    | 0.00                    | 0.14                    | 0.03                    | 0.00                    | 0.00                   |
| 2                | 7.04                                  | 9.68                                               | 0.00                                              | 0.00                                 | 233.12                  | 227.41                  | 117.18                  | 31.81                  | 51.04                   | 0.92                    | 74.58                   | 5.83                    | 0.03                    | 0.00                    | 0.00                    | 0.00                    | 0.00                    | 0.46                    | 0.61                    | 0.07                    | 0.00                    | 1.00                    | 0.80                    | 0.07                    | 0.00                    | 0.10                   |
| 5                | 7.06                                  | 9.90                                               | 0.00                                              | 0.00                                 | 194.93                  | 192.75                  | 189.83                  | 24.68                  | 35.48                   | 1.29                    | 67.04                   | 4.87                    | 0.02                    | 0.01                    | 0.00                    | 0.00                    | 0.02                    | 1.92                    | 3.64                    | 0.11                    | 0.07                    | 0.40                    | 2.29                    | 0.83                    | 0.00                    | 0.16                   |
| 11               | 7.08                                  | 9.31                                               | 0.00                                              | 0.00                                 | 253.52                  | 137.95                  | 135.80                  | 31.10                  | 24.95                   | 0.92                    | 12.96                   | 4.56                    | 0.02                    | 0.00                    | 0.00                    | 0.00                    | 0.01                    | 0.50                    | 0.57                    | 0.10                    | 0.03                    | 0.12                    | 0.89                    | 0.12                    | 0.00                    | 0.26                   |
| 12               | 8.35                                  | 17.47                                              | 1.71                                              | 0.00                                 | 374.93                  | 314.56                  | 213.82                  | 46.00                  | 61.85                   | 1.54                    | 65.01                   | 7.92                    | 0.02                    | 0.00                    | 0.00                    | 0.00                    | 0.02                    | 0.91                    | 1.88                    | 0.12                    | 0.03                    | 0.51                    | 1.88                    | 0.33                    | 0.00                    | 0.31                   |
| 14               | 9.40                                  | 17.47                                              | 1.71                                              | 0.00                                 | 159.64                  | 163.55                  | 108.71                  | 19.25                  | 42.60                   | 0.84                    | 65.18                   | 3.74                    | 0.02                    | 0.00                    | 0.00                    | 0.00                    | 0.00                    | 0.66                    | 0.65                    | 0.06                    | 0.00                    | 0.00                    | 0.81                    | 0.24                    | 0.00                    | 0.00                   |
| 6                | 10.33                                 | 17.48                                              | 3.79                                              | 0.00                                 | 227.07                  | 123.96                  | 201.68                  | 19.67                  | 11.43                   | 1.06                    | 0.00                    | 3.42                    | 0.02                    | 0.00                    | 0.00                    | 0.00                    | 0.01                    | 0.64                    | 1.75                    | 0.12                    | 0.04                    | 0.35                    | 1.34                    | 0.56                    | 0.00                    | 0.17                   |
| 18               | 10.65                                 | 61.67                                              | 58.20                                             | 36.24                                | 307.94                  | 342.25                  | 191.48                  | 50.19                  | 52.27                   | 1.59                    | 113.17                  | 7.25                    | 0.00                    | 0.02                    | 0.00                    | 0.00                    | 0.03                    | 0.82                    | 1.67                    | 0.01                    | 0.06                    | 0.12                    | 1.62                    | 0.27                    | 0.03                    | 0.40                   |
| 13               | 12.07                                 | 25.04                                              | 1.35                                              | 0.00                                 | 138.42                  | 116.80                  | 111.48                  | 16.49                  | 14.93                   | 0.72                    | 10.63                   | 2.45                    | 0.01                    | 0.00                    | 0.00                    | 0.00                    | 0.00                    | 0.86                    | 1.42                    | 0.06                    | 0.02                    | 0.07                    | 0.92                    | 0.38                    | 0.00                    | 0.08                   |
| 3                | 14.31                                 | 9.68                                               | 0.00                                              | 0.00                                 | 219.25                  | 162.02                  | 121.32                  | 26.85                  | 32.62                   | 0.90                    | 55.08                   | 5.59                    | 0.04                    | 0.00                    | 0.00                    | 0.00                    | 0.01                    | 0.92                    | 1.78                    | 0.07                    | 0.09                    | 1.35                    | 1.08                    | 0.25                    | 0.00                    | 0.19                   |
| 19               | 16.71                                 | 115.69                                             | 205.58                                            | 0.00                                 | 1077.91                 | 1174.22                 | 535.59                  | 187.98                 | 256.89                  | 6.65                    | 605.91                  | 25.42                   | 0.00                    | 0.05                    | 0.00                    | 0.00                    | 0.08                    | 2.99                    | 4.72                    | 0.01                    | 0.14                    | 0.91                    | 3.25                    | 0.45                    | 0.06                    | 1.23                   |
| 4                | 18.92                                 | 10.87                                              | 0.00                                              | 0.00                                 | 352.63                  | 300.76                  | 269.36                  | 48.85                  | 60.21                   | 2.09                    | 99.02                   | 9.11                    | 0.08                    | 0.01                    | 0.00                    | 0.00                    | 0.03                    | 1.65                    | 5.13                    | 0.19                    | 0.14                    | 2.79                    | 1.62                    | 0.79                    | 0.00                    | 0.34                   |
| 16               | 21.15                                 | 49.86                                              | 3.89                                              | 0.00                                 | 392.68                  | 425.82                  | 297.96                  | 78.26                  | 54.45                   | 1.95                    | 53.67                   | 7.74                    | 0.23                    | 0.04                    | 0.00                    | 0.00                    | 0.04                    | 0.96                    | 2.13                    | 0.03                    | 0.04                    | 0.26                    | 2.50                    | 0.16                    | 0.01                    | 0.50                   |
| 15               | 23.14                                 | 49.86                                              | 3.89                                              | 0.00                                 | 632.54                  | 781.34                  | 395.27                  | 155.72                 | 125.05                  | 3.84                    | 257.79                  | 15.03                   | 0.29                    | 0.06                    | 0.00                    | 0.00                    | 0.08                    | 1.94                    | 4.60                    | 0.01                    | 0.12                    | 0.56                    | 3.37                    | 0.34                    | 0.02                    | 1.01                   |
| 8                | 45.75                                 | 49.86                                              | 3.89                                              | 0.00                                 | 1637.30                 | 623.76                  | 709.82                  | 127.10                 | 66.77                   | 3.79                    | 0.00                    | 27.01                   | 0.01                    | 0.05                    | 0.00                    | 0.00                    | 0.05                    | 2.06                    | 1.08                    | 0.42                    | 0.00                    | 0.40                    | 2.64                    | 0.16                    | 0.00                    | 1.69                   |
| Bog <sup>a</sup> | 11.81                                 | 30.14                                              | 17.55                                             | 3.83                                 | 342.62                  | 286.02                  | 198.51                  | 49.09                  | 50.64                   | 1.56                    | 84.30                   | 7.19                    | 0.05                    | 0.01                    | 0.00                    | 0.00                    | 0.02                    | 0.96                    | 1.78                    | 0.09                    | 0.05                    | 0.58                    | 1.38                    | 0.27                    | 0.01                    | 0.35                   |
| 15               | 1.43                                  | 0.00                                               | 0.00                                              | 26.02                                | 87.47                   | 63.21                   | 42.68                   | 116.32                 | 12.22                   | 341.82                  | 290.69                  | 2.53                    | 0.12                    | 0.14                    | 0.00                    | 0.00                    | 0.01                    | 0.00                    | 0.08                    | 0.00                    | 0.03                    | 0.53                    | 0.18                    | 0.07                    | 0.09                    | 0.09                   |
| 5                | 2.52                                  | 0.00                                               | 0.00                                              | 4.78                                 | 199.95                  | 288.01                  | 77.14                   | 160.20                 | 27.52                   | 1.09                    | 363.11                  | 4.81                    | 0.00                    | 0.07                    | 0.00                    | 0.00                    | 0.07                    | 3.61                    | 0.57                    | 0.11                    | 0.07                    | 0.79                    | 0.12                    | 0.11                    | 0.10                    | 0.20                   |
| 12               | 2.73                                  | 0.00                                               | 0.00                                              | 0.00                                 | 179.13                  | 156.03                  | 58.79                   | 114.29                 | 8.61                    | 1.16                    | 412.40                  | 4.87                    | 0.00                    | 0.16                    | 0.00                    | 0.00                    | 0.02                    | 0.00                    | 0.79                    | 0.00                    | 0.04                    | 1.52                    | 0.20                    | 0.09                    | 0.29                    | 0.17                   |
| 11               | 3.17                                  | 0.00                                               | 0.00                                              | 2.40                                 | 279.77                  | 58.92                   | 69.26                   | 215.35                 | 29.40                   | 23.00                   | 534.12                  | 5.74                    | 0.07                    | 0.21                    | 0.00                    | 0.00                    | 0.04                    | 4.17                    | 0.15                    | 0.00                    | 0.01                    | 0.36                    | 0.21                    | 0.08                    | 0.18                    | 0.21                   |
| 13               | 3.57                                  | 0.00                                               | 0.00                                              | 1.19                                 | 387.53                  | 82.65                   | 129.31                  | 245.36                 | 23.24                   | 2.59                    | 532.85                  | 8.85                    | 0.03                    | 0.21                    | 0.00                    | 0.00                    | 0.04                    | 0.00                    | 1.56                    | 0.00                    | 0.02                    | 0.64                    | 0.33                    | 0.12                    | 0.25                    | 0.38                   |
| 17               | 4.16                                  | 0.00                                               | 0.00                                              | ND                                   | 308.14                  | 344.93                  | 107.89                  | 298.11                 | 32.01                   | 16.58                   | 744.34                  | 5.51                    | 0.01                    | 0.08                    | 0.00                    | 0.00                    | 0.05                    | 2.06                    | 0.97                    | 0.01                    | 0.04                    | 0.67                    | 0.21                    | 0.13                    | 0.11                    | 0.23                   |
| 18               | 5.92                                  | 13.84                                              | 0.00                                              | 2.46                                 | 403.60                  | 131.62                  | 102.90                  | 274.62                 | 40.68                   | 8.48                    | 804.19                  | 4.71                    | 0.03                    | 0.09                    | 0.04                    | 0.04                    | 0.03                    | 0.00                    | 1.63                    | 0.03                    | 0.04                    | 1.65                    | 0.23                    | 0.14                    | 0.15                    | 0.21                   |
| 14               | 6.46                                  | 87.81                                              | ND                                                | ND                                   | 407.40                  | 80.04                   | 132.11                  | 428.80                 | 52.76                   | 84.31                   | 692.17                  | 8.07                    | 0.11                    | 0.22                    | 0.04                    | 0.04                    | 0.05                    | 0.00                    | 3.83                    | 0.03                    | 0.05                    | 2.70                    | 0.43                    | 0.15                    | 0.27                    | 0.34                   |
| 19               | 6.52                                  | 6.69                                               | 0.00                                              | 0.00                                 | 476.95                  | 434.52                  | 157.55                  | 279.94                 | 8.27                    | 3.02                    | 935.96                  | 8.61                    | 0.18                    | 0.13                    | 0.00                    | 0.00                    | 0.04                    | 0.00                    | 0.39                    | 0.00                    | 0.06                    | 0.25                    | 0.96                    | 0.13                    | 0.15                    | 0.37                   |
| 16               | 7.14                                  | 26.83                                              | 0.00                                              | 5.70                                 | 451.19                  | 325.60                  | 211.77                  | 415.50                 | 63.38                   | 3.50                    | 672.25                  | 10.32                   | 0.00                    | 0.18                    | 0.00                    | 0.00                    | 0.06                    | 2.45                    | 2.31                    | 0.01                    | 0.06                    | 0.38                    | 0.57                    | 0.50                    | 0.28                    | 0.45                   |
| 8                | 7.19                                  | 28.14                                              | 0.00                                              | 0.00                                 | 716.66                  | 249.35                  | 336.77                  | 415.46                 | 57.59                   | 730.60                  | 1174.41                 | 18.06                   | 0.14                    | 0.20                    | 0.00                    | 0.01                    | 0.12                    | 0.00                    | 3.95                    | 0.01                    | 0.19                    | 1.64                    | 3.88                    | 0.31                    | 0.16                    | 0.81                   |
| 20               | 7.53                                  | 10.37                                              | 38.48                                             | 15.44                                | 356.62                  | 358.33                  | 250.83                  | 156.55                 | 55.87                   | 4.92                    | 445.68                  | 12.39                   | 0.02                    | 0.11                    | 0.14                    | 0.01                    | 0.11                    | 1.09                    | 3.74                    | 0.01                    | 0.07                    | 0.85                    | 0.62                    | 0.27                    | 0.16                    | 0.56                   |
| 4                | 8.54                                  | 78.33                                              | 0.00                                              | 11.32                                | 616.82                  | 449.24                  | 333.71                  | 417.65                 | 79.50                   | 7.42                    | 677.41                  | 18.22                   | 0.04                    | 0.32                    | 0.00                    | 0.02                    | 0.10                    | 7.10                    | 1.46                    | 0.00                    | 0.09                    | 0.95                    | 0.92                    | 0.33                    | 0.22                    | 0.81                   |
| 2                | 11.72                                 | 13.09                                              | 0.00                                              | 0.00                                 | 720.59                  | 803.21                  | 685.59                  | 305.41                 | 117.29                  | 19.78                   | 1106.33                 | 20.72                   | 0.13                    | 0.24                    | 0.00                    | 0.99                    | 0.46                    | 0.00                    | 3.93                    | 0.13                    | 11.05                   | 1.72                    | 4.48                    | 0.26                    | 0.38                    | 2.58                   |
| Man <sup>b</sup> | 5.61                                  | 18.94                                              | 2.96                                              | 5.78                                 | 399.42                  | 273.26                  | 192.59                  | 274.54                 | 43.45                   | 89.16                   | 670.42                  | 9.53                    | 0.06                    | 0.17                    | 0.02                    | 0.08                    | 0.09                    | 1.46                    | 1.81                    | 0.02                    | 0.84                    | 1.05                    | 0.95                    | 0.19                    | 0.20                    | 0.53                   |

<sup>a</sup> Average value for Bogotá. <sup>b</sup> Average value for Manizales. ND → No Data.
